# Supplementary material for: Non-planar perylenediimide acceptors with different geometrical linker units for efficient non-fullerene organic solar cells
Source: Royal Society of Chemistry journal article supplement (doi:10.1039/c6ta08739f), 2016-12-08
Supplement: c6ta08739f1.pdf [file c6ta08739f1.pdf]

Supplementary Information for

## Non-planar perylene-3,4,9,10-tetracarboxylic diimide acceptors with different geometrical linker units for efficient non-fullerene organic solar cells

Xi Liu,<sup>‡a</sup> Tao Liu,<sup>‡b</sup> Chunhui Duan,<sup>a</sup> Junyi Wang,<sup>a</sup> Shuting Pang,<sup>a</sup> Wentao Xiong<sup>b</sup>,  
Yanming Sun,<sup>\*b</sup> Fei Huang<sup>\*a</sup> and Yong Cao<sup>a</sup>

<sup>a</sup>State Key Laboratory of Luminescent Materials and Devices, Institute of Polymer Optoelectronic Materials and Devices, South China University of Technology, Guangzhou 510640, P. R. China. E-mail: [msfhuang@scut.edu.cn](mailto:msfhuang@scut.edu.cn)

<sup>b</sup>Heeger Beijing Research and Development Center, School of Chemistry and Environment, Beihang University, Beijing 100191, P. R. China. E-mail: [sunym@buaa.edu.cn](mailto:sunym@buaa.edu.cn)

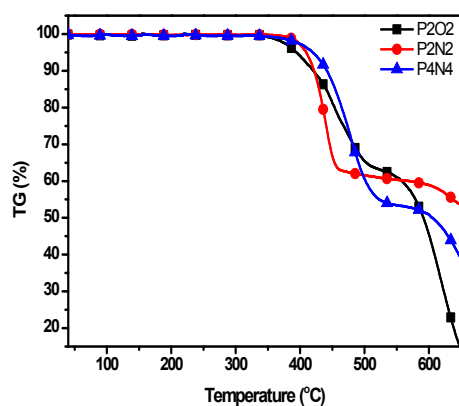

Fig. S1 The TG curve of the acceptors.

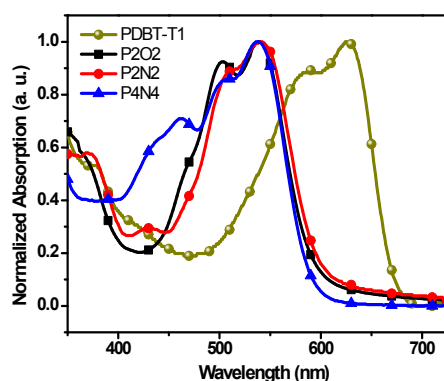

Fig. S2 UV-vis absorption spectra of the three PDI acceptors and PDBT-T1 in solid states.

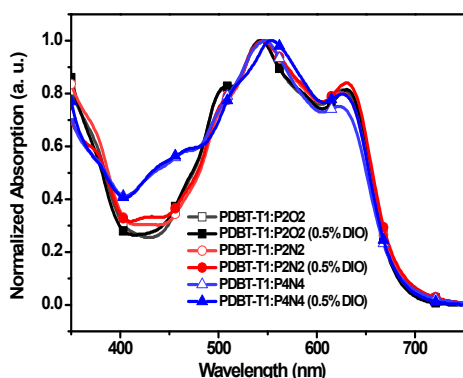

**Fig. S3** UV-vis absorption spectra of the three PDI acceptors based blend films with/without DIO additive.

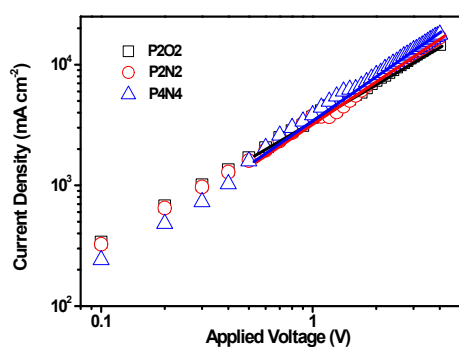

**Fig. S4** Current-voltage ( $I$ - $V$ ) characteristics of the PDIs neat films in space-charge-limited current (SCLC) devices.

**Table S1** Photovoltaic properties of OSCs based on PDBT-T1 and the PDI acceptors under AM 1.5 G at 100 mW cm<sup>-2</sup>. The average values and standard deviation of device statistics from 10 devices.

| PDBT-T1:PDIs | DIO (v/v) | $V_{oc}$ (V)  | $J_{sc}$ (mA cm <sup>-2</sup> ) | FF (%)     | PCE (%)     |
|--------------|-----------|---------------|---------------------------------|------------|-------------|
| P2O2         | 0%        | 0.910 ± 0.004 | 6.83 ± 0.10                     | 34.8 ± 0.7 | 2.15 ± 0.08 |
|              | 0.5%      | 0.876 ± 0.005 | 6.90 ± 0.08                     | 41.4 ± 0.4 | 2.50 ± 0.04 |
| P2N2         | 0%        | 0.963 ± 0.005 | 7.07 ± 0.14                     | 37.6 ± 0.6 | 2.56 ± 0.08 |
|              | 0.5%      | 0.946 ± 0.004 | 7.82 ± 0.10                     | 50.8 ± 0.3 | 3.76 ± 0.08 |
| P4N4         | 0%        | 0.982 ± 0.005 | 8.54 ± 0.12                     | 49.7 ± 0.5 | 4.17 ± 0.08 |
|              | 0.5%      | 0.957 ± 0.003 | 9.36 ± 0.07                     | 62.6 ± 0.6 | 5.60 ± 0.09 |

**Table S2** Photovoltaic properties of OSCs based on PTB7-Th and P4N4 under AM 1.5 G at 100 mW cm<sup>-2</sup>. The average values and standard deviation of device statistics from 10 devices.

|     | $V_{oc}$ (V) | $J_{sc}$ (mA cm <sup>-2</sup> ) | FF (%)       | PCE (%)     | Best PCE (%) |
|-----|--------------|---------------------------------|--------------|-------------|--------------|
| (a) | 0.78 ± 0.01  | 9.48 ± 0.15                     | 32.94 ± 1.08 | 2.43 ± 0.09 | 2.58         |
| (b) | 0.84 ± 0.01  | 10.71 ± 0.10                    | 41.05 ± 0.53 | 3.67 ± 0.06 | 3.72         |

(a) device structure: ITO/PEDOT:PSS/PTB7-Th:P4N4/Ca/Al; (b) device structure: ITO/ZnO/PFN-OX/PTB7-Th:P4N4/MoO<sub>3</sub>/Ag.

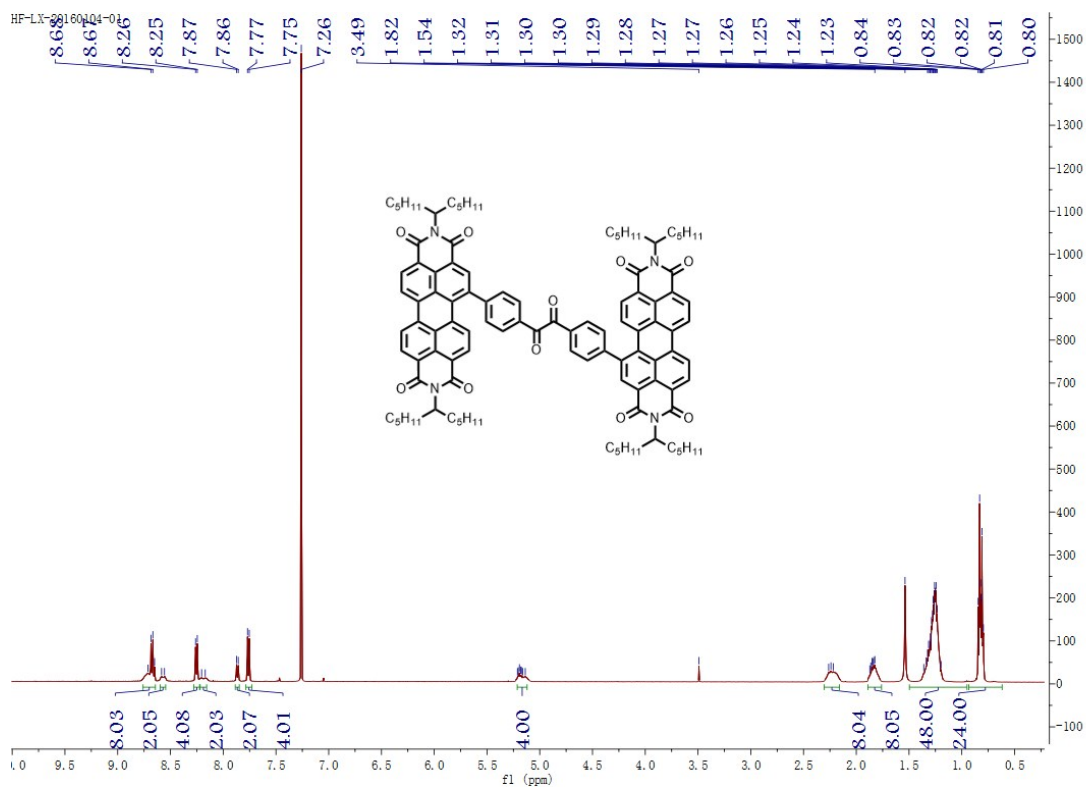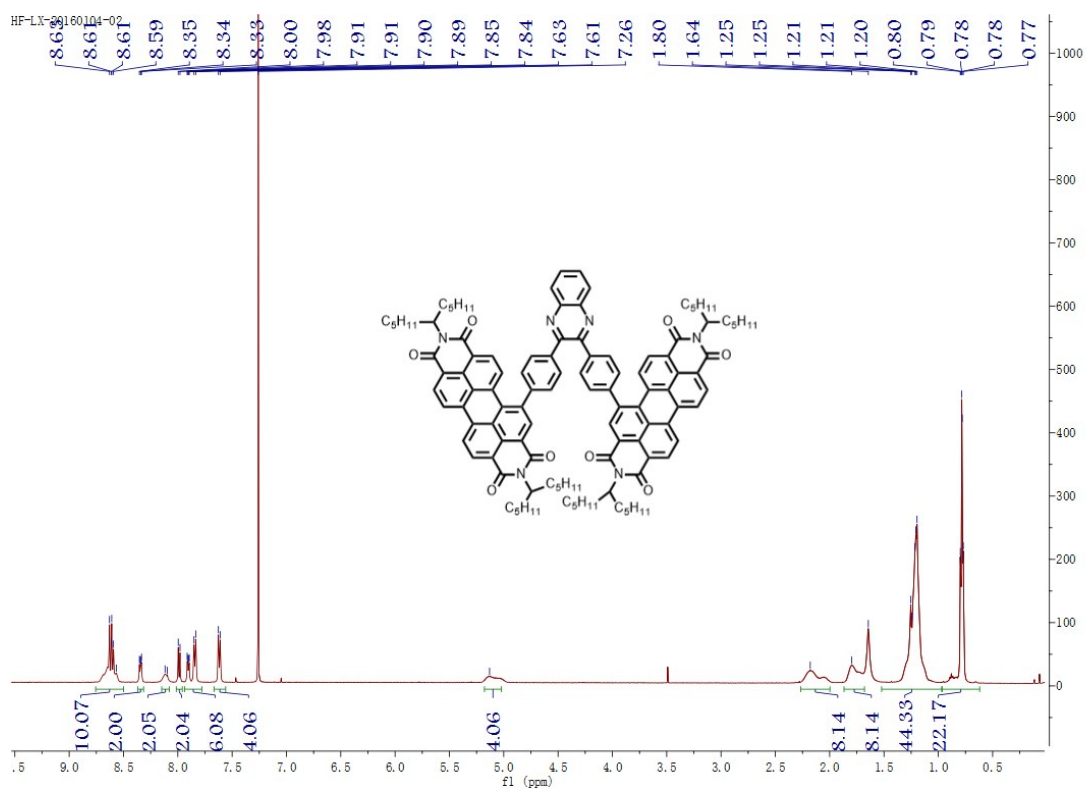

**Fig. S6**  $^1\text{H}$  NMR spectrum of P2N2 solution in  $\text{CDCl}_3$ .

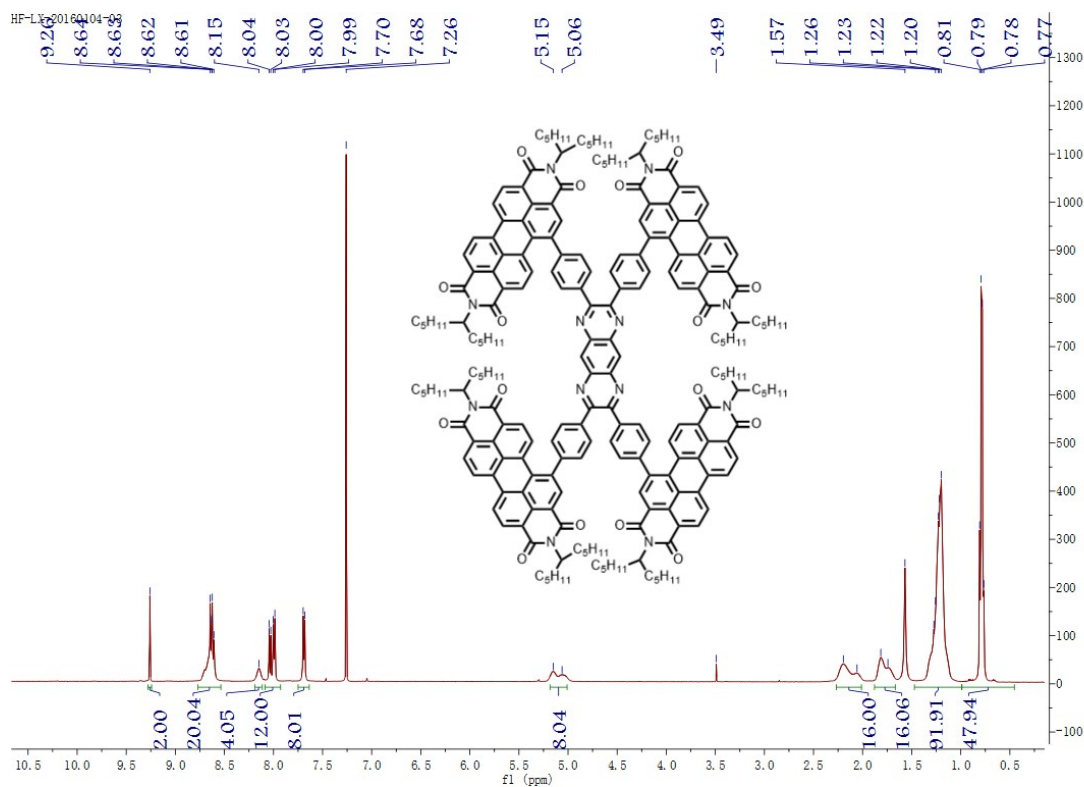

**Fig. S7**  $^1\text{H}$  NMR spectrum of P4N4 solution in  $\text{CDCl}_3$ .

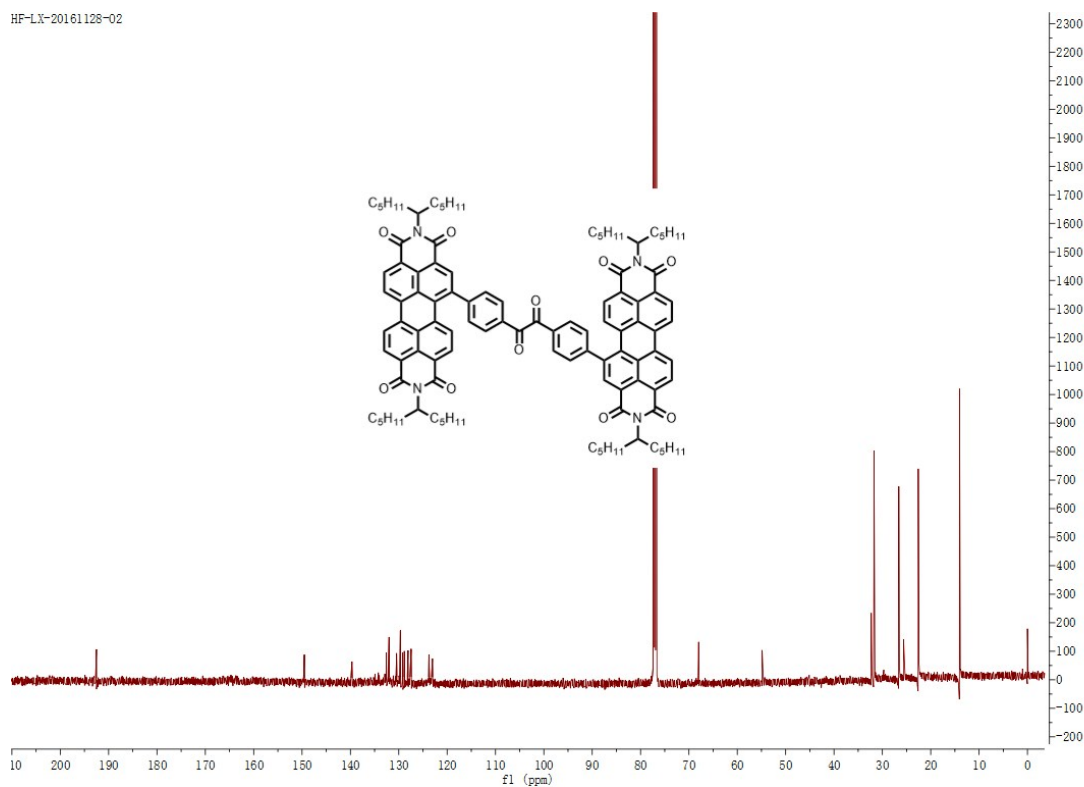

**Fig. S8**  $^{13}\text{C}$  NMR spectrum of P2O2 solution in  $\text{CDCl}_3$ .

hF-1x-20151224-01C-55N2

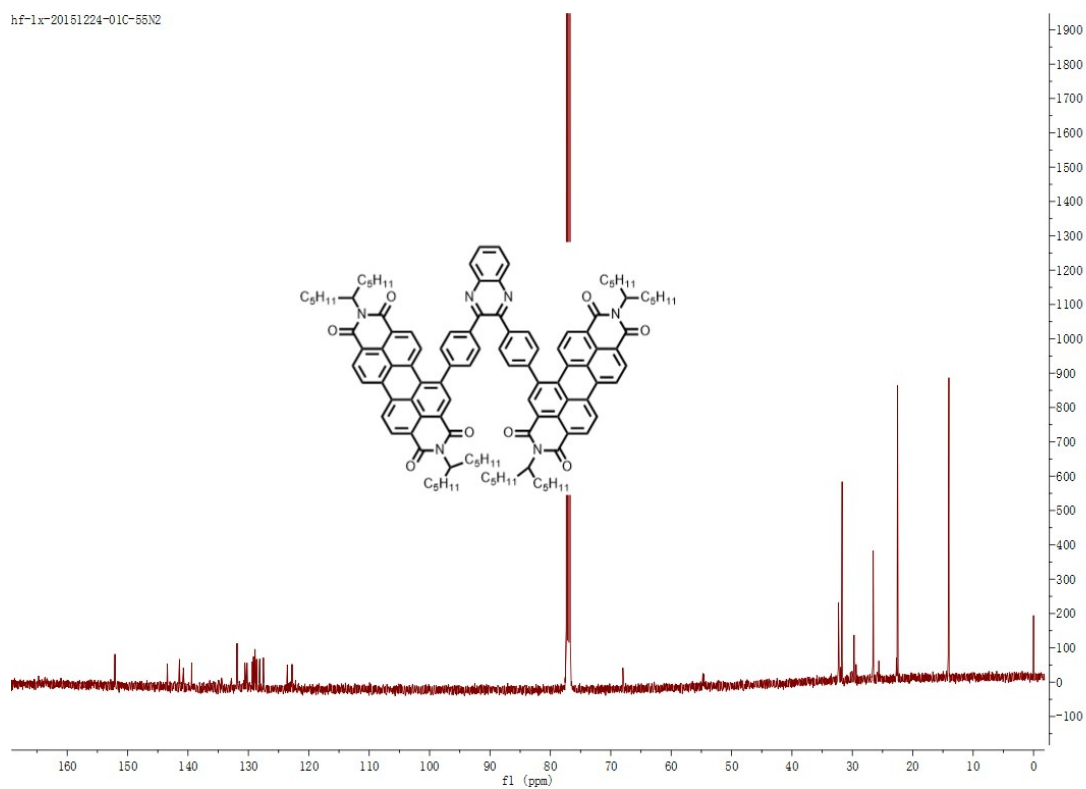

**Fig. S9** <sup>13</sup>C NMR spectrum of P2N2 solution in CDCl<sub>3</sub>.

HF-LX-20161128-N4

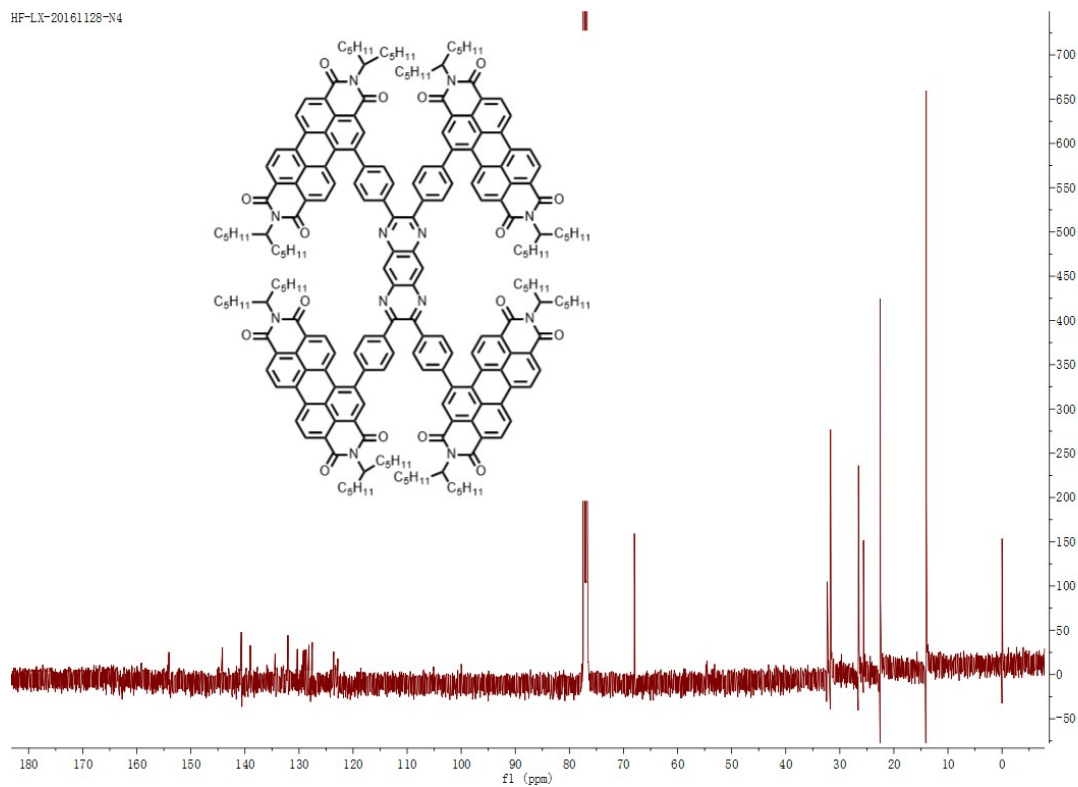

**Fig. S10** <sup>13</sup>C NMR spectrum of P4N4 solution in CDCl<sub>3</sub>.

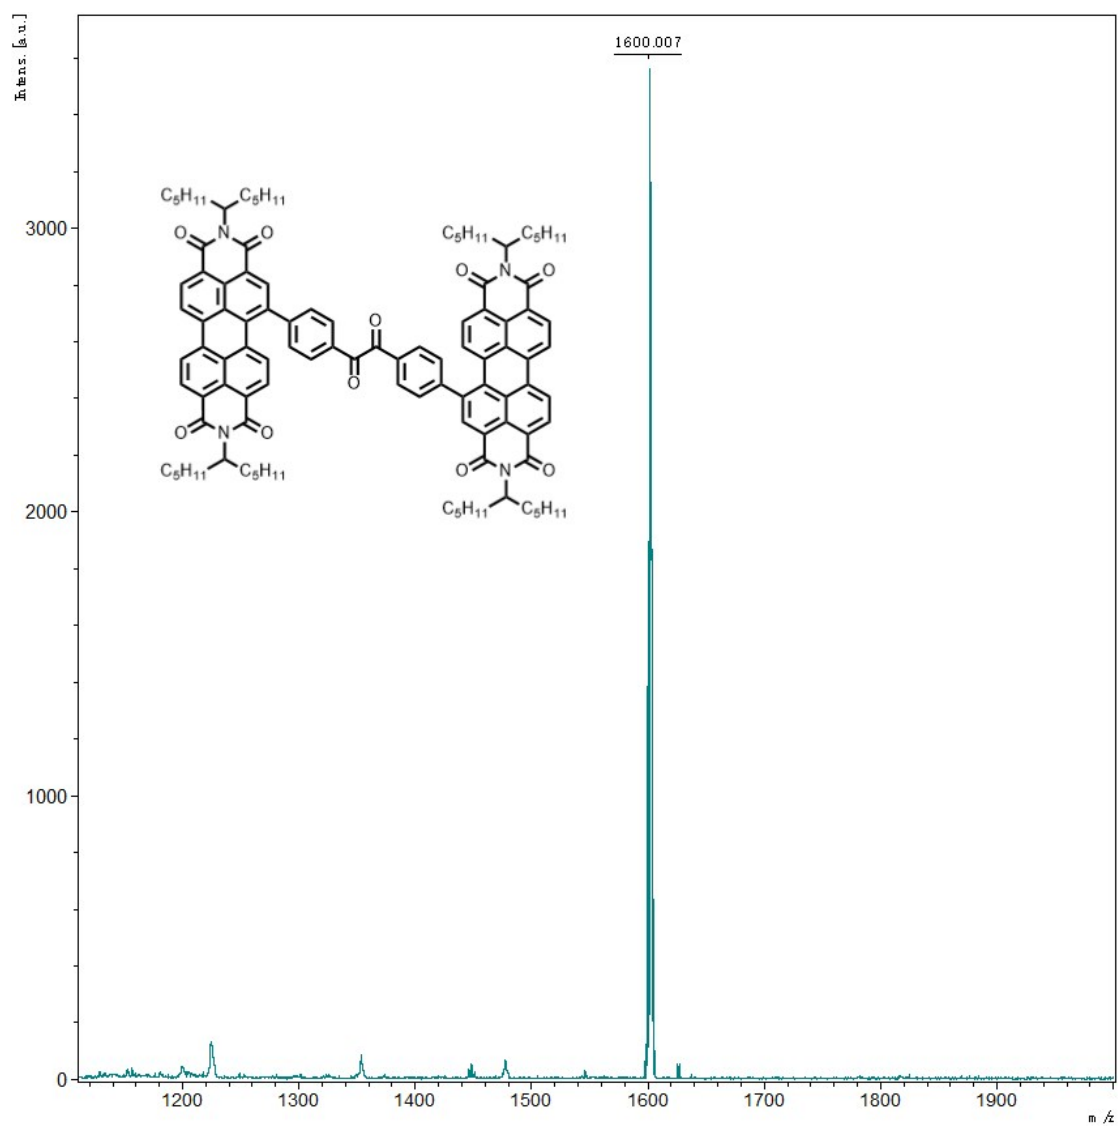

**Fig. S11** Mass (MALDI-TOF) spectrum of P2O2.

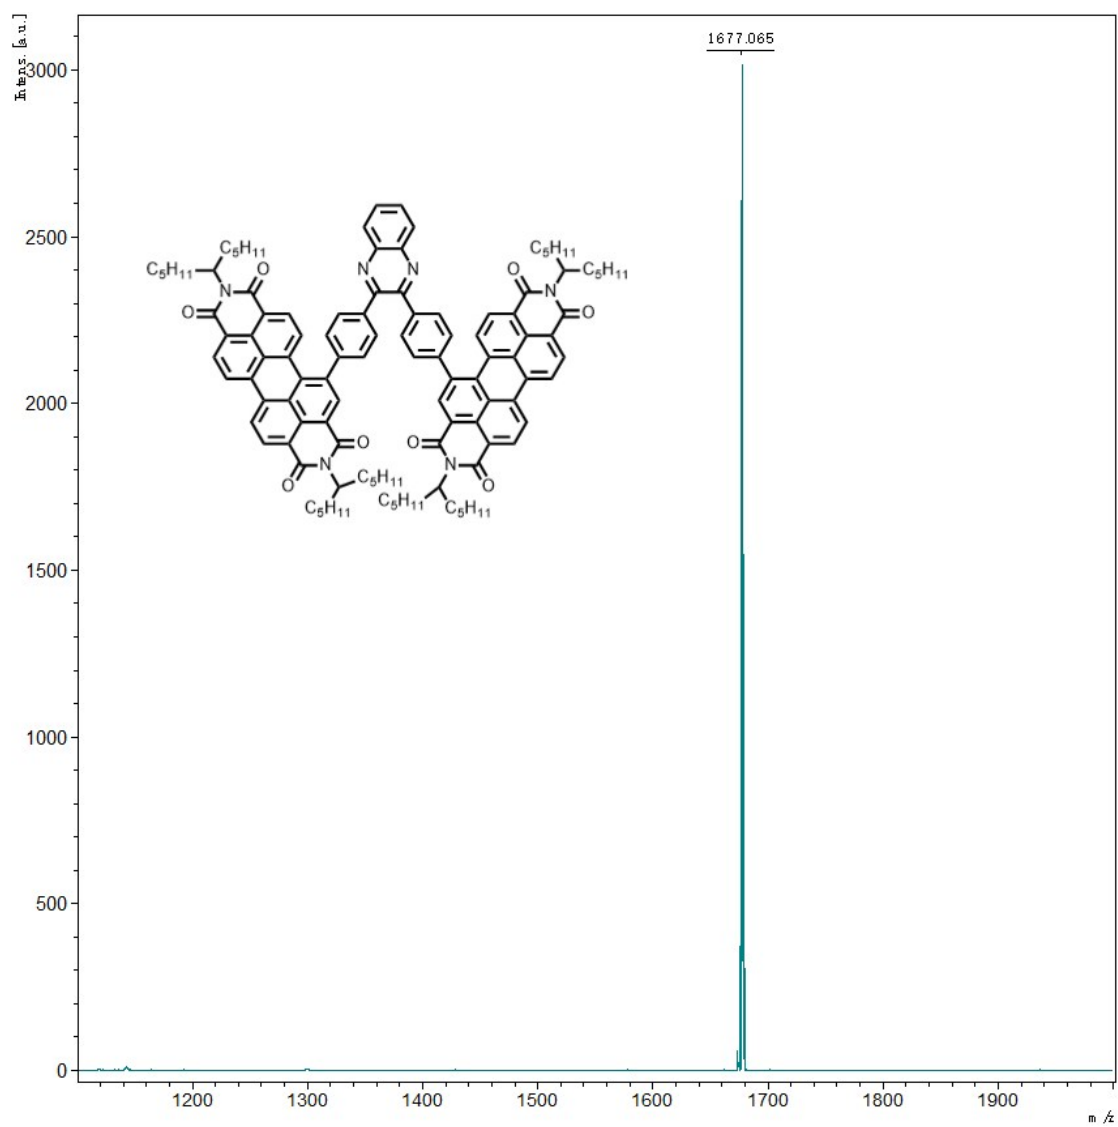

**Fig. S12** Mass (MALDI-TOF) spectrum of P2N2.

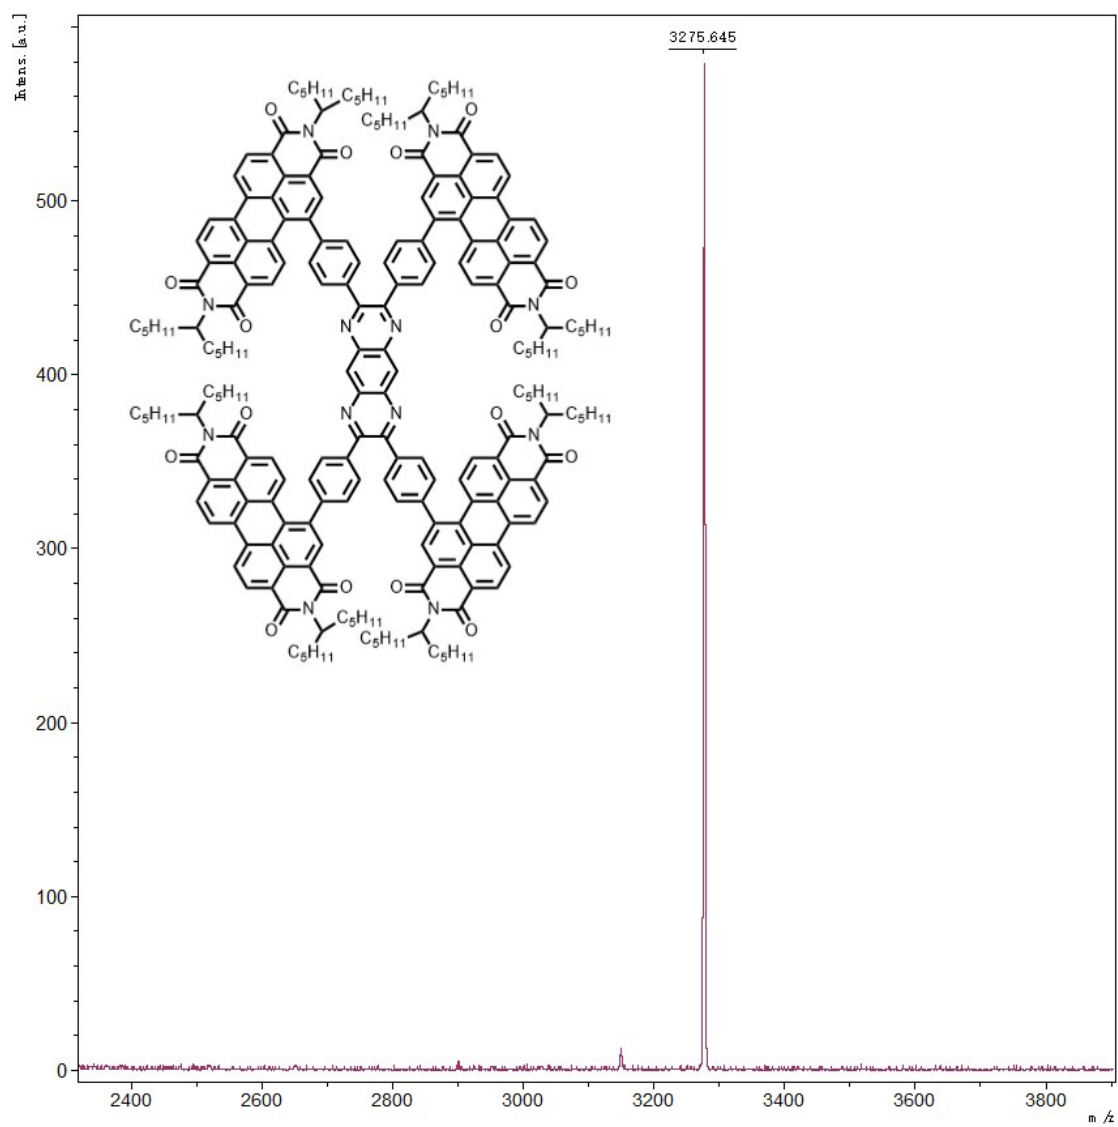

**Fig. S13** Mass (MALDI-TOF) spectrum of P4N4.
